# Supplementary material for: The effect of halogen bonding on the packing of bromine-substituted pyridine and benzyl functionalized resorcinarene tetrapodands in the solid state
Source: Royal Society of Chemistry journal article supplement (doi:10.1039/c2ce25972a), 2012-01-01

## Supporting Information for

# The Effect of Halogen Bonding on the Packing of Bromine Substituted Pyridine and Benzyl Functionalized Resorcinarene Tetrapodands in the Solid State

Tiia-Riikka Tero,<sup>a</sup> Kirsi Salorinne<sup>a</sup> and Maija Nissinen<sup>a</sup>

a) Department of Chemistry, Nanoscience Center, University of Jyväskylä, P.O. Box 35, 40014 JYU, Finland

### Details of the crystallization experiments

**Structure I** ( $C_{64}H_{64}O_8Br_4N_4 \cdot CHCl_3$ ): Colorless plate crystals ( $0.15 \times 0.05 \times 0.05$  mm) were grown from methanol-chloroform solution of **3** by slow evaporation at room temperature within a couple of days.

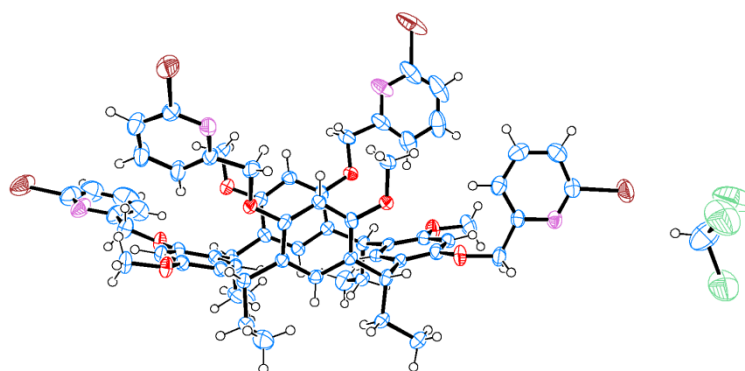

**Fig S1.** Ellipsoid plot at 50 % probability for structure **I** of compound **3**.

**Structure II** ( $C_{64}H_{64}Br_4N_4O_8 \cdot 2.5 CH_2Cl_2$ ): Colorless thin plate crystals ( $0.16 \times 0.10 \times 0.03$  mm) were grown from methanol-dichloromethane solution of **3** by slow evaporation at 2–8 °C within a couple of days.

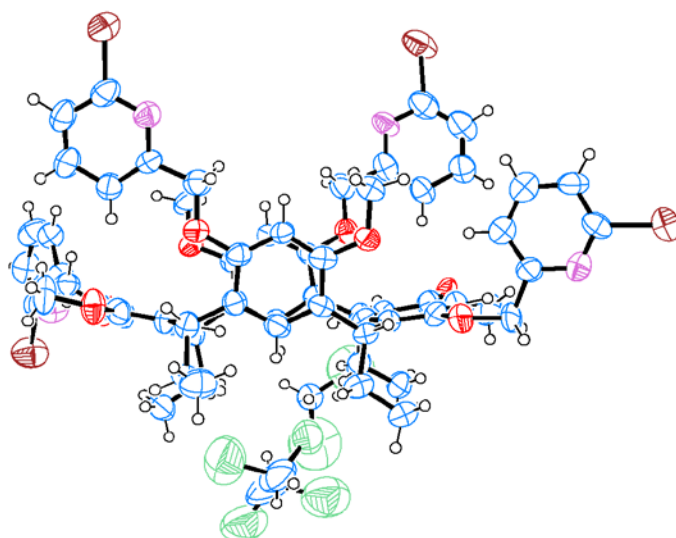

**Fig S2.** Ellipsoid plot at 50 % probability for structure **II** of compound **3**.

**Structure III** ( $C_{64}H_{64}O_8Br_4N_4 \cdot 3 CHCl_3$ ): Colorless block crystals ( $0.35 \times 0.20 \times 0.15$  mm) were grown from methanol-chloroform solution of **3** that contained excess amount of  $Cu(Cl_4O)_2 \cdot 6 H_2O$  during few months.

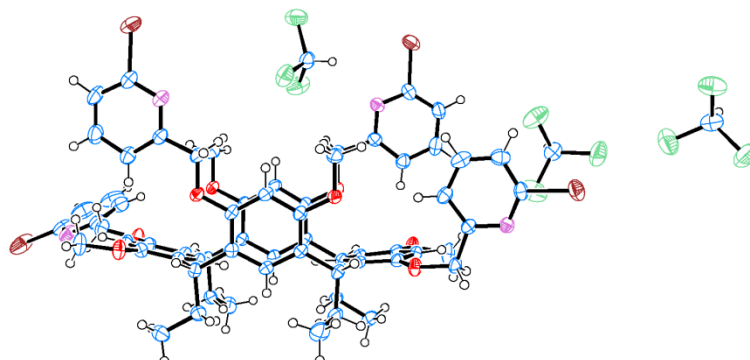

**Fig S3.** Ellipsoid plot at 50 % probability for structure **III** of compound **3**.

**Structure IV** ( $C_{68}H_{68}O_8Br_4 \cdot CH_3CN$ ): Colorless block crystals ( $0.20 \times 0.15 \times 0.05$  mm) were grown from acetonitrile-chloroform solution of **4** by slow evaporation within a couple of days.

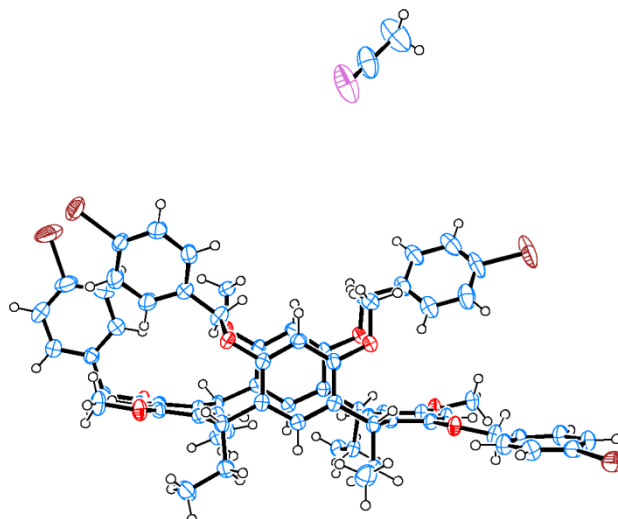

**Fig S4.** Ellipsoid plot at 50 % probability for structure **IV** of structure **4**.

### Conformational properties of the resorcinarene derivatives **3** and **4**

**Table S1** Conformational properties of the resorcinarene core in the structures **I–IV**

|                                | <b>I</b>                       | <b>II</b>                       | <b>III</b>                      | <b>IV</b>                     |
|--------------------------------|--------------------------------|---------------------------------|---------------------------------|-------------------------------|
| Dihedral angle <sup>a</sup> /° | 97.21/106.77,<br>167.18/170.64 | 103.44/103.81,<br>167.25/174.30 | 103.81/103.44,<br>167.59/169.94 | 87.04/83.82,<br>174.60/179.30 |
| Angle <sup>b</sup> /°          | 24.23/157.85                   | 27.46/157.82                    | 27.25/161.80                    | -8.91/174.09                  |
| Tilt/°                         | 6.67                           | 8.71                            | 0.05                            | 2.39                          |
| Twist/°                        | 5.42                           | 8.13                            | 0.22                            | 2.02                          |
| Distance <sup>c</sup> /Å       | 5.532/7.953                    | 5.610/7.929                     | 5.593/7.972                     | 4.834/8.028                   |

<sup>a</sup> Dihedral angles between the methine plane (C7-C14-C21-C28) and the upright and horizontal aromatic rings. <sup>b</sup> Between the opposite aromatic ring planes. <sup>c</sup> Between the opposite aromatic ring centroids.

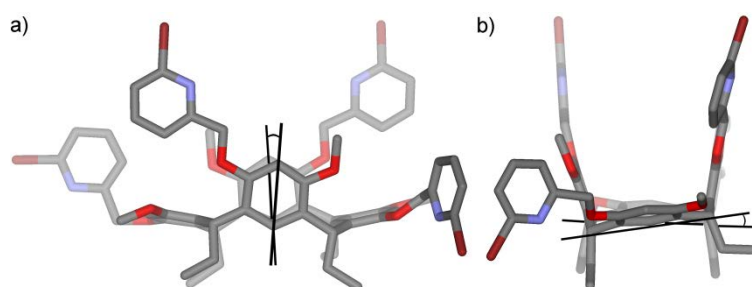

**Fig S5.** a) Tilt and b) twist angles of the pyridine and the benzyl functionalized resorcinarene tetrapodands (shown for structure **II**). Hydrogen atoms have been omitted for clarity.

### Additional figures for the structures of the bromopyridine- and pyridine derivatives of tetramethoxy resorcinarene

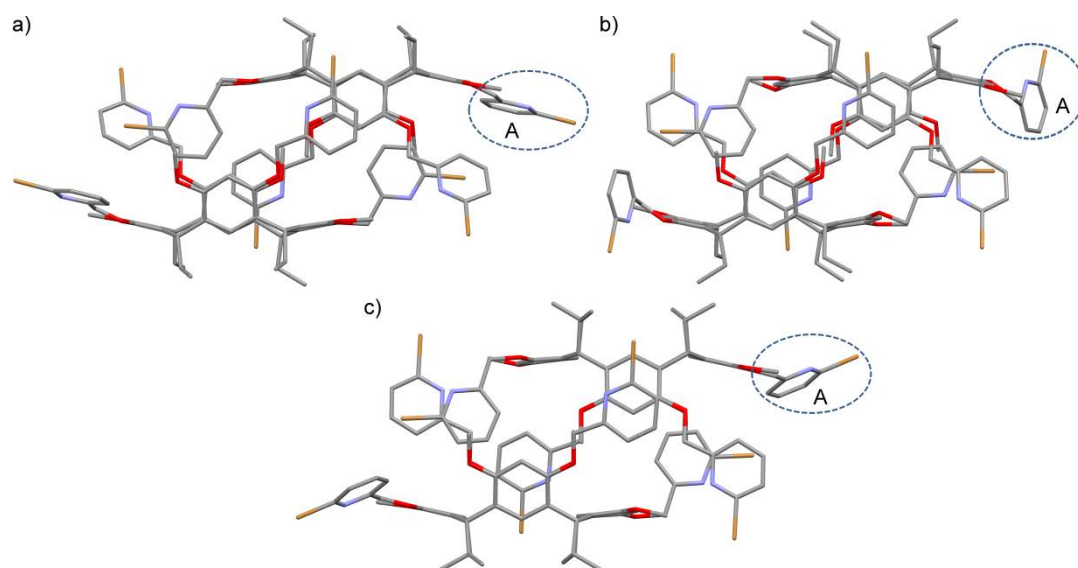

**Fig S6.** Front views of dimer pairs of a) structure **I**, b) structure **II** and c) structure **III** of compound **3**. The differently positioned pyridine rings (A) of the right-handed isomers have been circled and hydrogen atoms have been omitted for clarity.

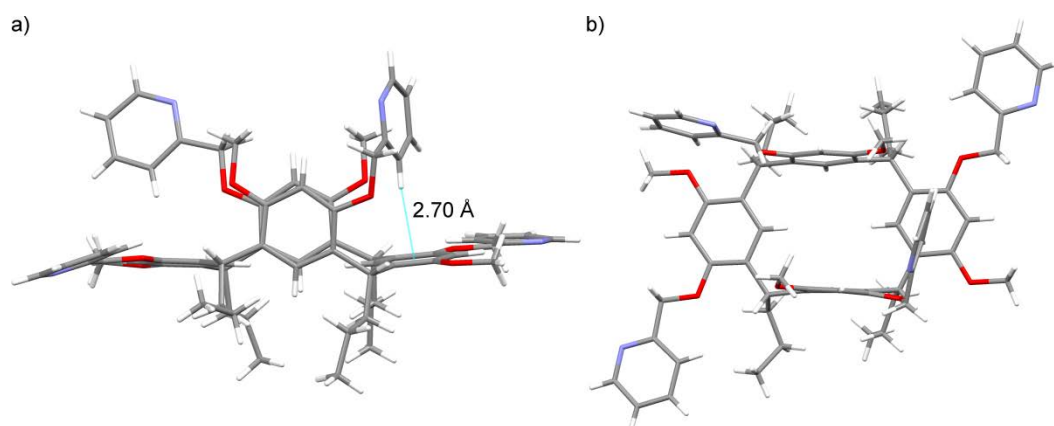

**Fig. S7** a) Front and b) top views of the structure CCDC 666176 published by McIldowie *et al.*<sup>1</sup> The aromatic edge-to-face interaction (2.70 Å) between the pyridine ring and the horizontal aromatic ring is shown with blue line.

<sup>1</sup> M. J. McIldowie, M. Mocerino, M. I. Ogden, B. W. Skelton, *Tetrahedron*, 2007, 63, 10817–10825. See structure: CCDC 666176

### $^1\text{H}$ and $^{13}\text{C}$ NMR spectra of compound 3

(in  $\text{CDCl}_3$  at  $30\text{ }^\circ\text{C}$ )

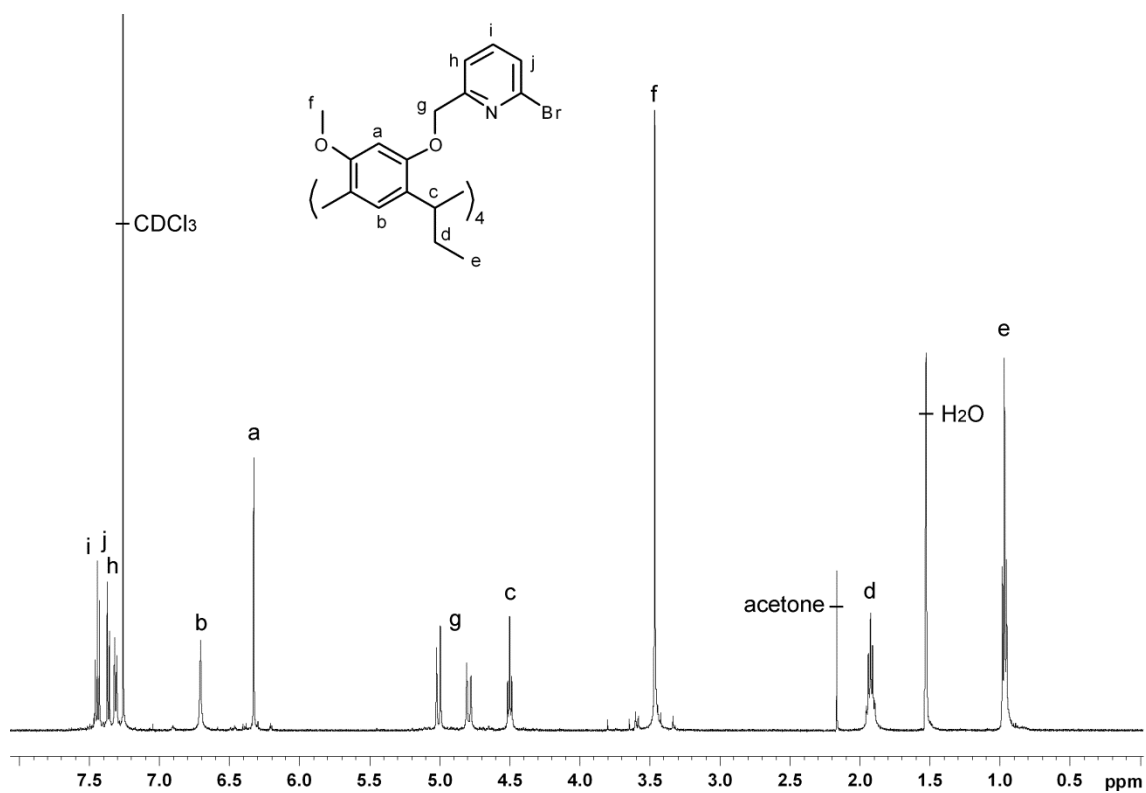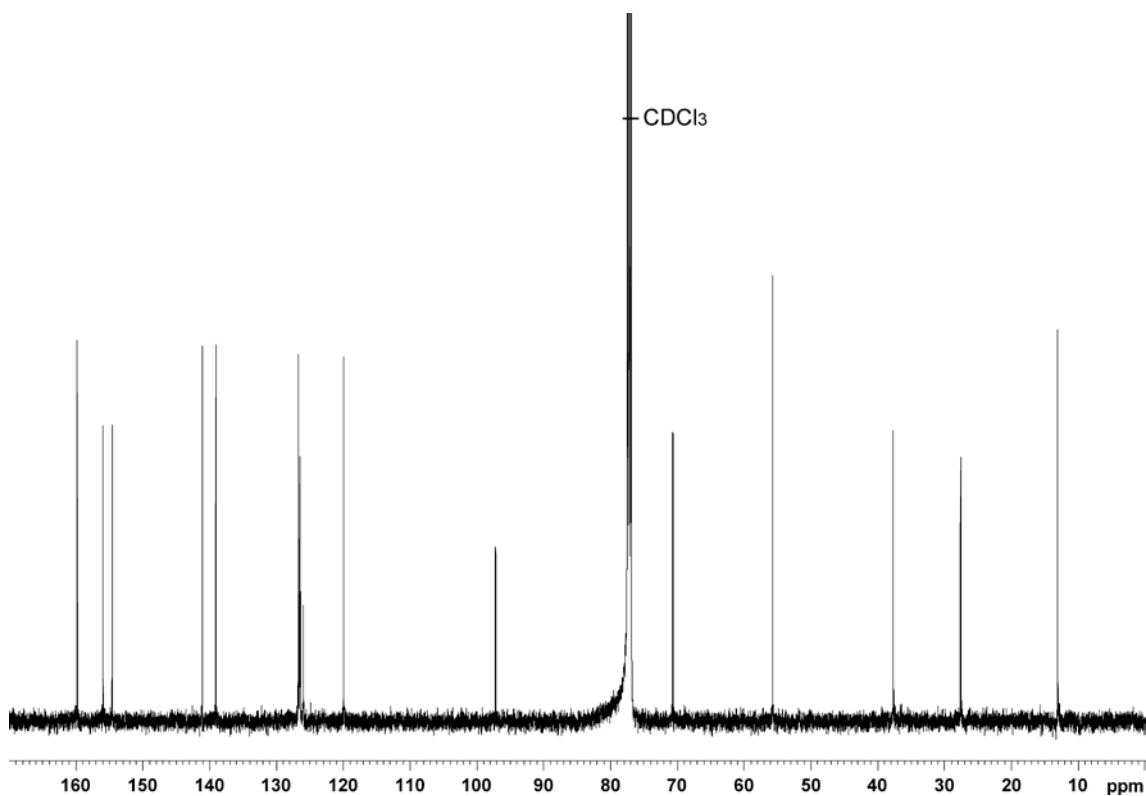

### $^1\text{H}$ and $^{13}\text{C}$ NMR spectra of compound 4

(in  $\text{CDCl}_3$  at 30 °C)

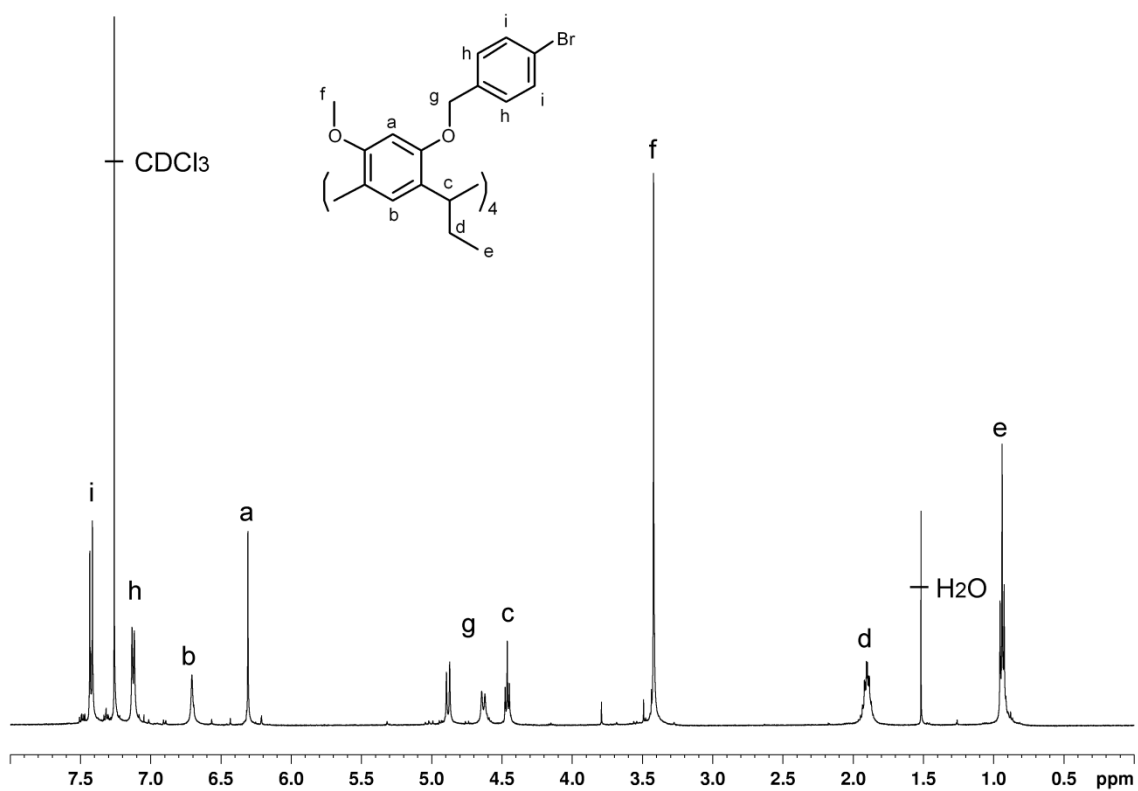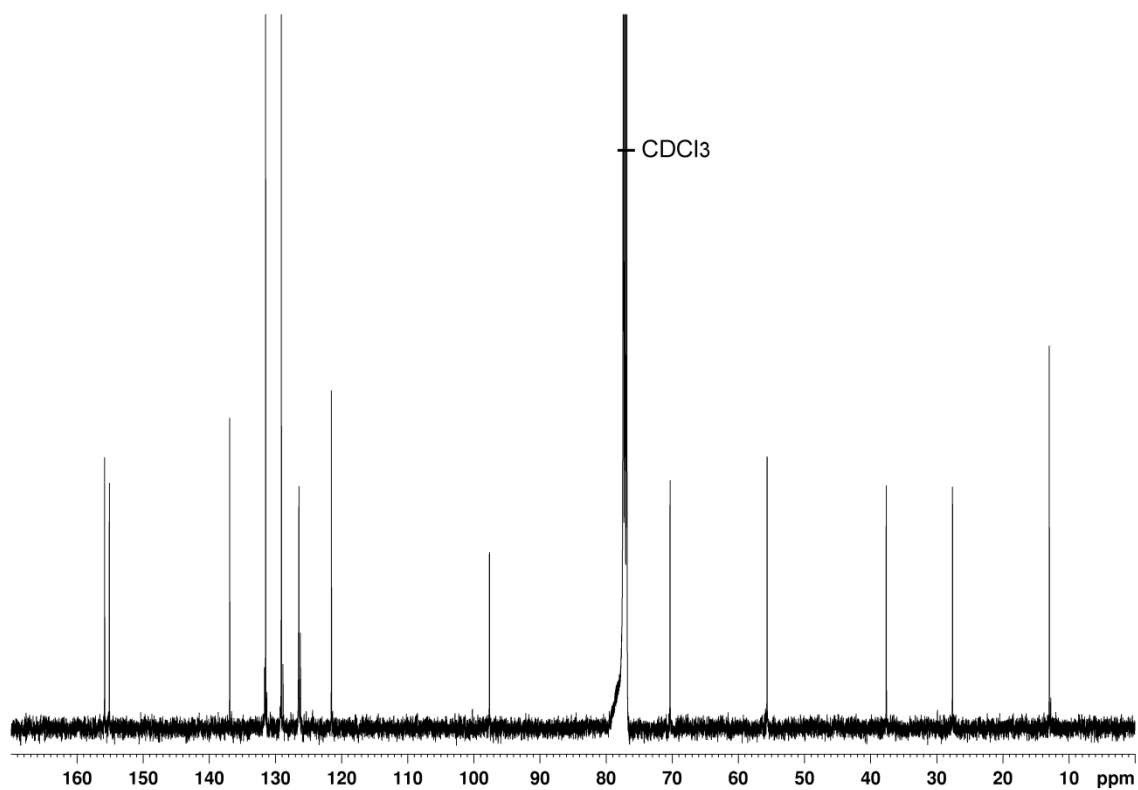

Supplement: c2ce25972a.pdf [file c2ce25972a.pdf]
